# Supplementary material
Source: publisher figshare collection journal article supplement (https://tandf.figshare.com/ndownloader/files/23613328)
Supplement: Supplementary file 1 [file 23613328]

## Search strategy

|                |                                                                                                                                                                                                                                                                                                                                                                                                                                      |
|----------------|--------------------------------------------------------------------------------------------------------------------------------------------------------------------------------------------------------------------------------------------------------------------------------------------------------------------------------------------------------------------------------------------------------------------------------------|
| Web of Science | <p>Search conducted 24.02.2020:<br/>           TOPIC: (wheelchair cushion) AND TOPIC: (pressure) AND TOPIC: (spinal cord injury)<br/>           Refined by: LANGUAGES: (ENGLISH)<br/>           Timespan: 2000-2020</p> <p>TOPIC: (wheelchair) AND TOPIC: (cushion) AND TOPIC: (pressure) AND TOPIC: (spinal cord injury)<br/>           Refined by: LANGUAGES: (ENGLISH)<br/>           Timespan: 2000-2020.</p> <p>=97 records</p> |
| PubMed         | <p>Search conducted 24.02.2020:<br/>           "Pressure"[Mesh]AND cushion [All Fields]) AND "Spinal Cord Injuries"[Mesh] Filters: Publication date from 2000/01/01 to 2020/01/1</p> <p>=25 records</p>                                                                                                                                                                                                                              |
| Embase         | <p>Search conducted 24.02.2020:<br/>           'wheelchair cushion':ti,ab,kw AND pressure:ti,ab,kw AND 'spinal cord injury':ti,ab,kw AND [2000-2020]/py</p> <p>=18 records</p>                                                                                                                                                                                                                                                       |
| CINAHL         | <p>Search conducted 24.02.2020:<br/>           TI wheelchair cushion AND TI pressure AND TI spinal cord injury<br/>           Expanders<br/>           Apply equivalent subjects<br/>           Limiters<br/>           Date Published: 20000101-20201231<br/>           English Language</p> <p>=9 records</p>                                                                                                                      |

## JBI Critical Appraisal Checklist for Analytical Cross Sectional Studies

Reviewer \_\_\_\_\_ Date \_\_\_\_\_

Author \_\_\_\_\_ Year \_\_\_\_\_ Record Number \_\_\_\_\_

|                                                                             | Yes                      | No                       | Unclear                  | Not<br>applicable        |
|-----------------------------------------------------------------------------|--------------------------|--------------------------|--------------------------|--------------------------|
| 1. Were the criteria for inclusion in the sample clearly defined?           | <input type="checkbox"/> | <input type="checkbox"/> | <input type="checkbox"/> | <input type="checkbox"/> |
| 2. Were the study subjects and the setting described in detail?             | <input type="checkbox"/> | <input type="checkbox"/> | <input type="checkbox"/> | <input type="checkbox"/> |
| 3. Was the exposure measured in a valid and reliable way?                   | <input type="checkbox"/> | <input type="checkbox"/> | <input type="checkbox"/> | <input type="checkbox"/> |
| 4. Were objective, standard criteria used for measurement of the condition? | <input type="checkbox"/> | <input type="checkbox"/> | <input type="checkbox"/> | <input type="checkbox"/> |
| 5. Were confounding factors identified?                                     | <input type="checkbox"/> | <input type="checkbox"/> | <input type="checkbox"/> | <input type="checkbox"/> |
| 6. Were strategies to deal with confounding factors stated?                 | <input type="checkbox"/> | <input type="checkbox"/> | <input type="checkbox"/> | <input type="checkbox"/> |
| 7. Were the outcomes measured in a valid and reliable way?                  | <input type="checkbox"/> | <input type="checkbox"/> | <input type="checkbox"/> | <input type="checkbox"/> |
| 8. Was appropriate statistical analysis used?                               | <input type="checkbox"/> | <input type="checkbox"/> | <input type="checkbox"/> | <input type="checkbox"/> |

Overall appraisal:    Include    ☐    Exclude    ☐    Seek further info    ☐

Comments (Including reason for exclusion)

---

---

---

## Data Extraction Form

[illegible]
